# Supplementary material for: Epithelial Tumors Originate in Tumor Hotspots, a Tissue-Intrinsic Microenvironment
Source: PLoS Biol. 2016 Sep 1;14(9):e1002537. doi: 10.1371/journal.pbio.1002537 (PMC5008749; doi:10.1371/journal.pbio.1002537)
Supplement: S1 Data — (XLSX) [file pbio.1002537.s001.xlsx]

## Sheet: Sheet1
Fig 8A
	scribIR			scribIR + RhoGEF2IR			lglIR			lglIR + RhoGEF2IR
Sample #	Apical Delamination	# of clones	%	Apical Delamination	# of clones	%	Apical Delamination	# of clones	%	Apical Delamination	# of clones	%
1	0	7	0	4	10	40	0	7	0	4	4	100
2	0	3	0	0	6	0	0	5	0	2	5	40
3	0	8	0	1	5	20	0	6	0	3	7	42.8571
4	0	6	0	3	7	42.8571	0	6	0	4	8	50
5	0	6	0	6	7	85.7143	0	8	0	3	5	60
6	0	5	0	4	7	57.1429	1	13	7.69231	4	6	66.6667
7	0	8	0	3	8	37.5	0	5	0	5	9	55.5556
8	0	5	0	4	9	44.4444	0	4	0	2	6	33.3333
9	0	5	0	2	4	50	0	8	0	3	7	42.8571
10	0	7	0	3	7	42.8571	0	9	0	2	5	40
Total	0	60	0	30	70	42.8571	1	71	1.40845	32	62	51.6129
Mean	0	6	0	3	7	42.0516	0.1	7.1	0.769231	3.2	6.2	53.127
Std. Deviation	0	1.56347	0	1.69967	1.76383	22.3207	0.316228	2.60128	2.43252	1.0328	1.54919	19.4098

## Sheet: Sheet2
Fig 8B
scribIR + RhoGEF2IR + STATCA
Sample #	1	2	3	4	5	6	7	8	9	10
# of stacked cells	6	5	4	3	5	3	4	2	6	5
	6	3	6	1	2	4	8	2	7	2
	5		3	2	3	8		1	3	3
					4			4	1	3
Total	17	8	13	6	14	15	12	9	17	13
Mean	5.66667	4	4.33333	2	3.5	5	6	2.25	4.25	3.25
Total Mean	4.025
Std. Deviation	1.32582
scribIR + RhoGEF2IR
Sample #	1	2	3	4	5	6	7	8	9	10
# of stacked cells	1	2	1	1	1	1	1	1	1	1
	2	2	1	1	1	4	1	1	1	1
	1	1	1	1	1		1	2	1	2
	1	1		1			3	4	1	2
		1		2				1	2	1
Total	5	7	3	6	3	5	6	9	6	7
Mean	1.25	1.4	1	1.2	1	2.5	1.5	1.8	1.2	1.4
Total Mean	1.425
Std. Deviation	0.446748
